# Supplementary material for: Tumorbedingte Fatigue – Prozessevaluation eines Seminars der Universitätsmedizin Greifswald
Source: Atypon-hosted journal article supplement (doi:10.1024/1012-5302/a000778), 2020-11-30
Supplement: 1012-5302_a000778_esm1.pdf [file 1012-5302_a000778_esm1.pdf]

Liebe Kolleginnen und Kollegen,

da viele Patientinnen und Patienten mit onkologischen Erkrankungen durch das Fatigue- Syndrom, eine physische und mentale Erschöpfung, belastet sind, führt das Patienteninformationszentrum (PIZ) vom 01.-15.03.18 in Zusammenarbeit mit dem Onkologischen Zentrum Vorpommern eine Befragung zum Thema „Umgang mit dem Fatigue- Syndrom bei Krebspatienten“ durch. Wir würden uns sehr freuen, wenn Sie uns durch Ihre Teilnahme unterstützen. Die Teilnahme ist selbstverständlich freiwillig und anonym. Der ausgefüllte Bogen kann bis zum 15.03.18 in die im Stationszimmer aufgestellte Box eingeworfen werden.

Vielen Dank für Ihre Teilnahme.

Das Team vom PIZ Ute Stutz und Heike Hingst

1) In welcher Klinik des Onkologischen Zentrums arbeiten Sie?

2) Ihre Berufserfahrung in Jahren \_\_\_\_\_

3) Wie schätzen Sie Ihr Wissen über das tumorbedingte Fatigue- Syndrom ein, wenn 0 „kein Wissen“ und 10 „viel Wissen/Expertenwissen“ bedeutet?

Kein Wissen [0] - [1] - [2] - [3] - [4] - [5] - [6] - [7] - [8] - [9] - [10] Expertenwissen

4) Wenn Sie an die Patientinnen und Patienten denken, die Sie tagtäglich behandeln: Durch welche Symptome sind diese am meisten beeinträchtigt?

- |                                          |                                                                                        |
|------------------------------------------|----------------------------------------------------------------------------------------|
| <input type="checkbox"/> Schmerzen       | <input type="checkbox"/> Begleitsymptome der (Strahlen-, Chemo-, usw.) Therapie/OP     |
| <input type="checkbox"/> Übelkeit        | <input type="checkbox"/> Fatiguesyndrom (Müdigkeit, physische und mentale Erschöpfung) |
| <input type="checkbox"/> Mangelernährung | <input type="checkbox"/> Andere: _____                                                 |

5) Achten Sie bei/in Ihrem Patientenkontakt auf mögliche Anzeichen eines Fatigue- Syndroms?

Ja

Nein (**Bitte weiter bei Frage 6**)

**Wenn ja:** Was tun Sie, um eine tumorbedingte Fatigue bei Ihren Patientinnen und Patienten festzustellen?

- |                                                                                                                                      |                                                                                                        |
|--------------------------------------------------------------------------------------------------------------------------------------|--------------------------------------------------------------------------------------------------------|
| <input type="checkbox"/> Einsatz von Fragebögen und/oder Screening-Instrumenten wie z.B. FSI, FACT-F, MFI, PFS, EORTC QLQ (FS), usw. | <input type="checkbox"/> Erfragen von Fatigue-Symptomen (z.B. Erschöpfung, Müdigkeit usw.) im Gespräch |
| <input type="checkbox"/> Eigene Beobachtungen                                                                                        | <input type="checkbox"/> Anderes: _____                                                                |
| <input type="checkbox"/> Anamnese                                                                                                    |                                                                                                        |

6) Wie viele Patientinnen und Patienten mit Fatigue- Syndrom begegnen Ihnen in Ihrer Versorgungsroutine, wenn 0 „kein Betroffener“ und 100 „alle Patientinnen und Patienten sind betroffen“ bedeutet?

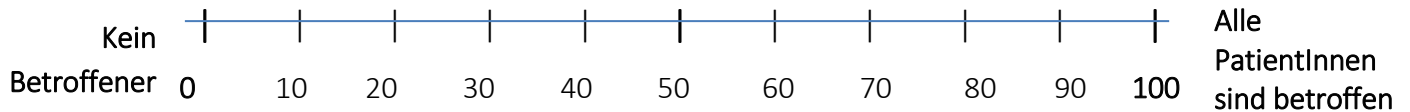

7) Wenn Sie im Behandlungsalltag ein Fatigue- Syndrom bei Ihren Patienten feststellen: Was tun Sie?

- Dokumentation des Vorliegens der Fatigue und ggf. deren Schwere
- Empfehlung von Reha-Sport
- Empfehlung von mehr Bewegung/Steigerung der körperlichen Aktivität, z.B. Spaziergehen
- Vermittlung an die Kollegen in der Psychologie
- Vermittlung an die Fatigue-Beratung der Kollegen des PIZ (FIBs)
- Empfehlung des Einsatzes von pharmakologischen Therapieverfahren
- Anders, und zwar: \_\_\_\_\_

8) Kennen Sie die vom PIZ angebotenen Fatigue-Seminare?

Ja

Nein (**Bitte weiter bei Frage 9**)

**Wenn ja:** Nutzen Sie die vom PIZ angebotenen Fatigue-Seminare bzw. empfehlen Sie diese Ihren Patientinnen und Patienten?

ja

gelegentlich

nein

9) Wer sollte Ihrer Meinung nach für die Aufklärung und Beratung des tumorbedingten Fatigue- Syndroms zuständig sein?

Ärzte

Pflegekräfte

Psychologen

Ein interdisziplinäres Team

Niemand. Die Fatigue ist nicht behandlungsbedürftig. Sie remittiert von allein.

10) Sofern Sie die Zuständigkeit bei sich sehen: Könnten Sie sich vorstellen, andere Berufsgruppen in die Aufklärung und Beratung über das Krankheitsbild einzubeziehen?

Ja, Kollegen der Psychologie

Ja, Kollegen aus dem Bereich der Pflege

Ja, (andere) ärztliche Kollegen

Nein, dies liegt in meinem Aufgaben- und Verantwortungsbereich

**Vielen Dank für Ihre Teilnahme!**

Bitte werfen Sie den beantworteten Bogen nun in die Box in Ihrem Stationszimmer ein.
